# Supplementary material
Source: PubMed Central journal article supplement (PMC2645831)
Supplement: M807593200_1.pdf [file M807593200_1.pdf]

**Supplementary Table I: GenBank Accession Numbers of human and mouse AAF-132 and AAF-44 clones**

| <b><u>GenBank Accession No:</u></b> | <b><u>Species:</u></b> | <b><u>Description:</u></b>                     |
|-------------------------------------|------------------------|------------------------------------------------|
| <b><u>AAF-132:</u></b>              |                        |                                                |
| NM_025099                           | human                  | cDNA, 5036 bp, with 59 nucleotides of 5'UTR    |
| NM_026889                           | mouse                  | cDNA, 3980 bp, with 20 nucleotides of 5'UTR    |
| NM_001013256*                       | mouse                  | cDNA, 3964 bp, with 20 nucleotides of 5'UTR    |
| NT_096135                           | mouse                  | genomic clone, chromosome 11                   |
| NW_001030477                        | mouse                  | genomic clone, chromosome 11                   |
| BB854410                            | mouse                  | 463 bp EST, extending 5'UTR to 222 nucleotides |
| BY024588                            | mouse                  | 362 bp EST, extending 5'UTR to 208 nucleotides |
| BY024814                            | mouse                  | 373 bp EST, extending 5'UTR to 208 nucleotides |
| <b><u>AAF-44:</u></b>               |                        |                                                |
| NM_024928                           | human                  | cDNA, 1451 bp, with 171 nucleotides of 5'UTR   |
| NM_175360                           | mouse                  | cDNA, 1878 bp, with 229 nucleotides of 5'UTR   |
| NT_039687                           | mouse                  | genomic clone, chromosome 19                   |
| NW_001030643                        | mouse                  | genomic clone, chromosome 19                   |
| W17593                              | mouse                  | 206 bp EST, extending 5'UTR to 349 nucleotides |
| BY104517                            | mouse                  | 341 bp EST, extending 5'UTR to 332 nucleotides |
| WI7719                              | mouse                  | 293 bp EST, extending 5'UTR to 327 nucleotides |

---

\* NM\_001013256 contains a 16 bp deletion between nucleotides 218 and 233 of NM\_026889 (nucleotide 217 represents the end of exon II).

**Supplementary Table II: Sequence Discrepancies Found in Murine AAF-132 and AAF-44 cDNA Sequences.** The cDNA sequences obtained for murine AAF-132 and AAF-44 were compared with the respective cDNA clones published in GenBank. Differences are indicated by listing the nucleotides with their positions in NM\_026889 (for AAF-132) or NM\_175360 (for AAF-44), followed by the nucleotides found in our clones, and the amino acid change, if applicable. The corresponding amino acid in the human sequence (NM\_025099) is noted under “remarks.”

| <u>Nucleotide Change*</u> | <u>Amino Acid Change</u> | <u>Remarks:</u>         |
|---------------------------|--------------------------|-------------------------|
| <b><u>AAF 132:</u></b>    |                          |                         |
| C854T                     | No Change                |                         |
| A866G                     | No Change                |                         |
| T1061C                    | No Change                |                         |
| T1365C                    | S449P                    | S in the human sequence |
| T1398C                    | No Change                |                         |
| C1829T                    | No Change                |                         |
| T1922G                    | No Change                |                         |
| A2336G                    | No Change                |                         |
| T2469C, C2471T            | S817P                    | P in the human sequence |
| G2511T                    | A831S                    | S in the human sequence |
| C2915T                    | No Change                |                         |
| G3260A                    | No Change                |                         |
| A3610G                    | Q1197R                   | R in the human sequence |
| A3641G                    | No Change                |                         |
| <b><u>AAF 44:</u></b>     |                          |                         |
| T1249C                    | No Change                |                         |

---

\*GenBank *versus* our sequence

## Supplemental Fig. 1

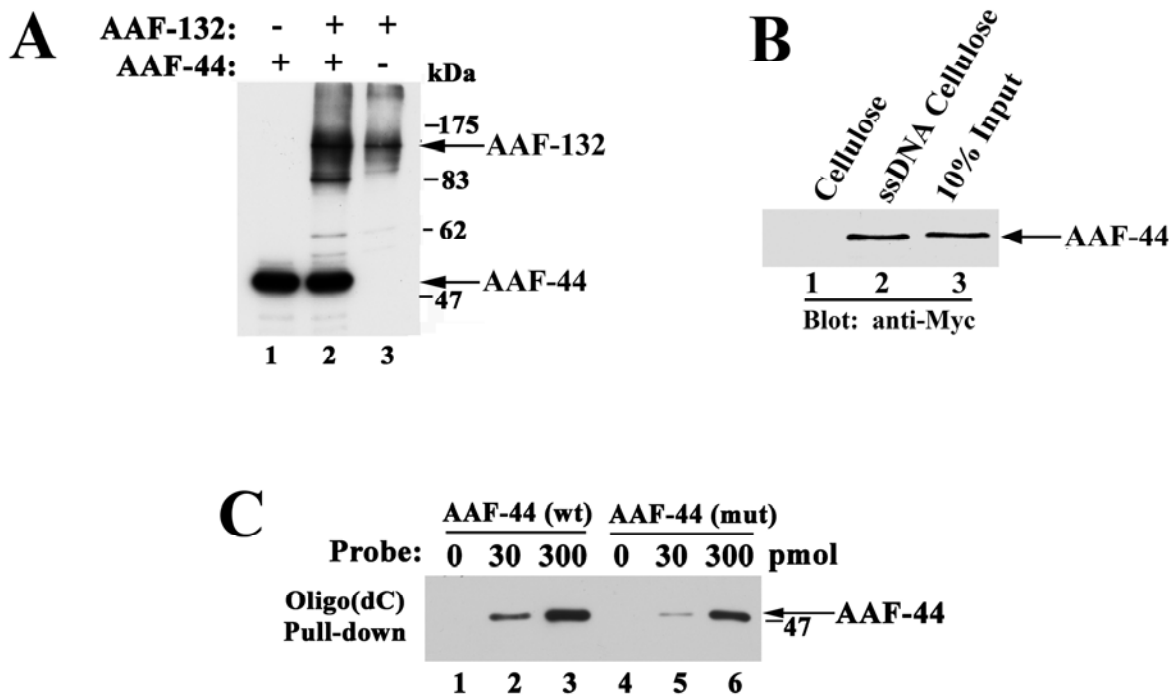

### Supplemental Fig. 1:

**A:** 293T cells were transfected as described in Fig. 4A with equal amounts of expression vectors encoding Myc epitope-tagged AAF-44 (lane 1), Myc-tagged AAF-132 (lane 3), or both (lane 2), and equal amounts of cell lysate protein were analyzed by Western blotting with anti-Myc antibody. **B:** Cells were transfected with Myc epitope-tagged AAF-44 and ~200  $\mu$ g of cell lysate protein was incubated for 1 h at 4°C with 25  $\mu$ l of pre-swelled ssDNA cellulose (ssDNA from calf thymus) or plain control cellulose in a total volume of 200  $\mu$ l (both types of cellulose were from Sigma). The cellulose beads were washed three times in lysis buffer, bound proteins were eluted in SDS sample buffer, and analyzed by SDS-PAGE/Western blotting using an anti-Myc antibody. **C:** Cells were transfected with equal amounts of vector expressing Flag-tagged wild type AAF-44 (lanes 1-3) or mutant AAF-44 (W96A/F151A, lanes 4-6), and binding to 30 or 300 pmol of oligo(dC)<sub>30</sub> probe was assessed by Western blotting with anti-Flag antibody as described in Fig. Fig. 4A.

## Supplemental Fig. 2

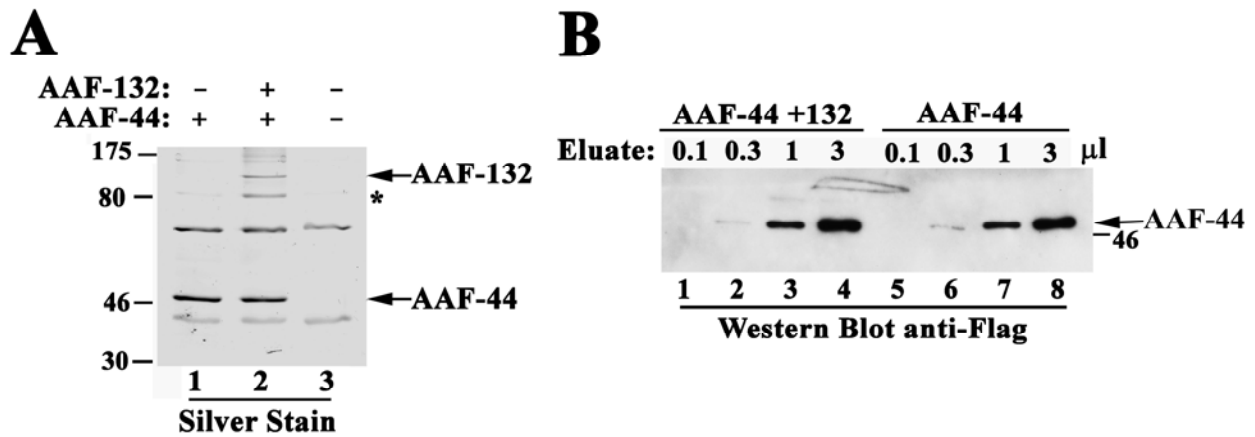

### Supplemental Fig. 2:

**A:** 293T cells were transfected with Flag-tagged AAF-44 (lanes 1 and 2), Myc-tagged AAF-132 (lane 2), or empty vector (lane 3); cell lysate proteins were passed over an anti-Flag antibody affinity matrix, and eluted with Flag peptide as described in Experimental Procedures. Equal amounts of eluates were analyzed by SDS-PAGE/silver staining. Full-length AAF-132 and -44 are indicated by arrows, and the asterisk denotes an ~80 kDa breakdown product of AAF-132, as confirmed by Western blotting with anti-Myc antibodies (not shown). **B:** Increasing amounts of the eluates described in lanes 1 and 2 of panel A were analyzed by SDS-PAGE/Western blotting with anti-Flag antibody.
